# Supplementary material
Source: HighWire-hosted journal article supplement (https://bmjopen.bmj.com/content/10/7/e038302)

**Figure S1** Receiver operator characteristic curve of occlusion length for TLR (a) and TVR (b)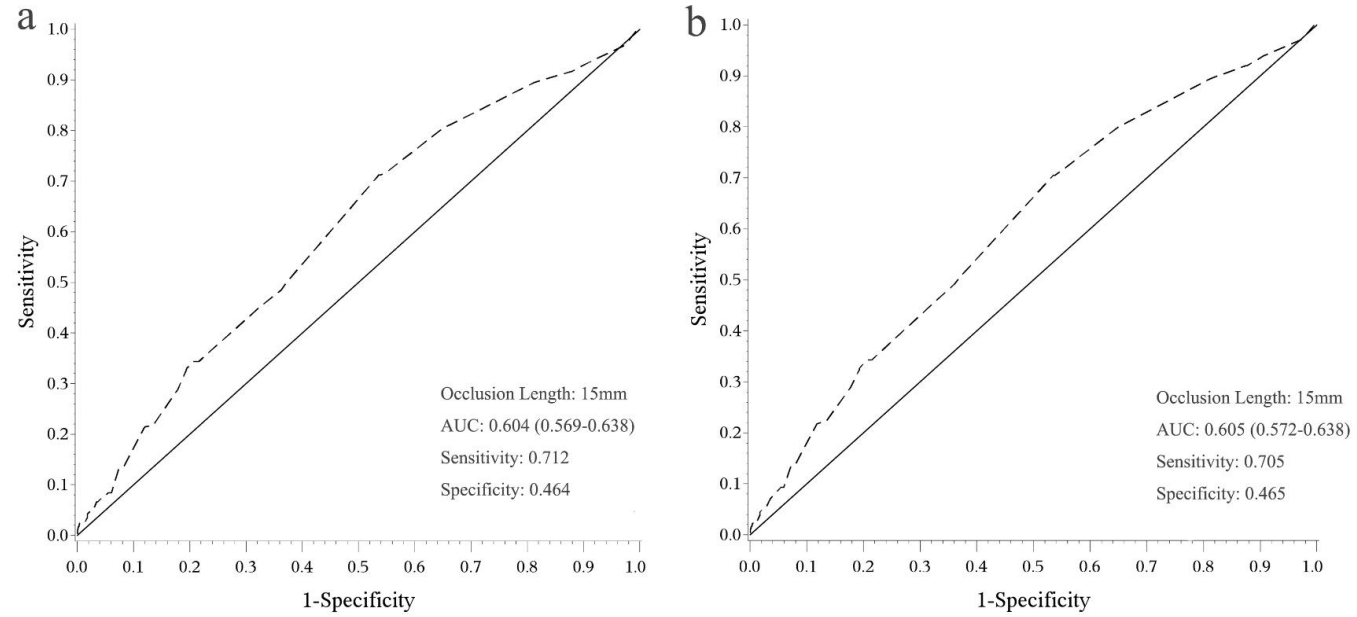

Supplement: inline-supplementary-material-1 [file inline-supplementary-material-1.pdf]
